# Supplementary material for: Shotgun Lipidomics Revealed Altered Profiles of Serum Lipids in Systemic Lupus Erythematosus Closely Associated with Disease Activity
Source: PubMed Central journal article supplement (PMC6315961; doi:10.3390/biom8040105), 2018-10-03
Supplement: biomolecules-08-00105-s001.pdf [file biomolecules-08-00105-s001.pdf]

Table S1. A list of the lipid species used for multivariate analysis.

|        | Species    | Mean (nmol/mL plasma) |       | SEM    |      |
|--------|------------|-----------------------|-------|--------|------|
|        |            | Normal                | SLE   | Normal | SLE  |
| LPC-1  | P16:0      | 8.93                  | 8.28  | 0.80   | 0.86 |
| LPC-2  | A16:0      | 1.46                  | 1.23  | 0.07   | 0.11 |
| LPC-3  | 16:1       | 10.04                 | 9.53  | 0.68   | 0.71 |
| LPC-4  | 16:0       | 73.79                 | 71.43 | 2.51   | 3.04 |
| LPC-5  | P18:0      | 2.48                  | 2.11  | 0.23   | 0.24 |
| LPC-6  | 18:2       | 39.36                 | 31.85 | 2.10   | 1.19 |
| LPC-7  | 18:1       | 14.20                 | 13.63 | 0.59   | 0.85 |
| LPC-8  | 18:0       | 18.83                 | 16.70 | 0.83   | 0.92 |
| LPC-9  | 20:4       | 5.98                  | 5.94  | 0.30   | 0.44 |
| LPC-10 | 20:3       | 1.02                  | 1.05  | 0.09   | 0.10 |
| PE-1   | D16:0-18:2 | 1.86                  | 2.45  | 0.14   | 0.17 |
| PE-2   | D16:0-18:1 | 0.98                  | 0.85  | 0.09   | 0.09 |
| PE-3   | D16:1-20:4 | 1.47                  | 1.11  | 0.12   | 0.25 |
| PE-4   | D16:0-20:4 | 2.84                  | 2.88  | 0.18   | 0.20 |
| PE-5   | D18:1-18:2 | 1.55                  | 1.83  | 0.11   | 0.13 |
| PE-6   | D18:0-18:2 | 4.93                  | 5.74  | 0.31   | 0.39 |
| PE-7   | D18:0-18:1 | 1.10                  | 1.00  | 0.06   | 0.09 |
| PE-8   | D16:0-22:6 | 3.08                  | 4.58  | 0.22   | 0.30 |
| PE-9   | D18:1-20:4 | 2.61                  | 2.46  | 0.14   | 0.17 |
| PE-10  | D18:0-20:4 | 10.89                 | 8.31  | 0.56   | 0.74 |
| PE-11  | D18:0-20:3 | 0.78                  | 0.87  | 0.08   | 0.09 |
| PE-12  | D18:1-22:6 | 0.58                  | 0.63  | 0.07   | 0.04 |
| PE-13  | D18:0-22:6 | 2.01                  | 2.69  | 0.15   | 0.19 |
| PE-14  | D18:0-22:5 | 0.77                  | 0.76  | 0.05   | 0.09 |
| PE-15  | D20:0-20:4 | 0.63                  | 0.25  | 0.06   | 0.06 |
| PE-16  | D20:0-20:0 | 0.67                  | 0.44  | 0.04   | 0.06 |
| Cer-1  | N16:0      | 0.31                  | 0.29  | 0.02   | 0.02 |
| Cer-2  | N20:0      | 0.11                  | 0.11  | 0.01   | 0.01 |
| Cer-3  | N22:0      | 0.83                  | 0.78  | 0.04   | 0.05 |
| Cer-4  | N23:0      | 0.60                  | 0.56  | 0.04   | 0.04 |
| Cer-5  | N24:2      | 0.07                  | 0.07  | 0.01   | 0.01 |
| Cer-6  | N24:1      | 0.97                  | 1.38  | 0.06   | 0.15 |
| Cer-7  | N24:0      | 2.50                  | 2.54  | 0.16   | 0.16 |
| Cer-8  | OH_N24:0   | 0.08                  | 0.05  | 0.01   | 0.01 |
| SM-1   | N14:0      | 3.54                  | 3.09  | 0.24   | 0.19 |
| SM-2   | N15:0      | 1.92                  | 1.72  | 0.12   | 0.11 |
| SM-3   | N16:1      | 10.55                 | 11.26 | 0.30   | 0.40 |
| SM-4   | N16:0      | 62.76                 | 68.12 | 1.73   | 2.32 |
| SM-5   | N17:0      | 1.01                  | 0.93  | 0.06   | 0.07 |

|       |                       |        |        |      |       |
|-------|-----------------------|--------|--------|------|-------|
| SM-6  | N18:1                 | 5.24   | 6.18   | 0.20 | 0.29  |
| SM-7  | N18:0                 | 7.91   | 9.88   | 0.28 | 0.48  |
| SM-8  | N20:1                 | 2.90   | 3.42   | 0.14 | 0.23  |
| SM-9  | N20:0                 | 5.19   | 5.52   | 0.22 | 0.32  |
| SM-10 | N21:0                 | 1.15   | 0.93   | 0.09 | 0.09  |
| SM-11 | N22:2                 | 0.84   | 0.99   | 0.08 | 0.14  |
| SM-12 | N22:1                 | 9.56   | 9.50   | 0.41 | 0.64  |
| SM-13 | N22:0                 | 11.24  | 10.19  | 0.39 | 0.44  |
| SM-14 | N23:1                 | 3.33   | 2.96   | 0.18 | 0.21  |
| SM-15 | N23:0                 | 3.37   | 3.11   | 0.16 | 0.21  |
| SM-16 | N24:3                 | 1.59   | 1.59   | 0.11 | 0.14  |
| SM-17 | N24:2                 | 13.42  | 14.74  | 0.72 | 0.89  |
| SM-18 | N24:1                 | 22.33  | 25.41  | 1.21 | 2.01  |
| SM-19 | N24:0                 | 5.93   | 5.29   | 0.24 | 0.32  |
| PI-1  | 16:0-18:2             | 0.84   | 0.69   | 0.09 | 0.09  |
| PI-2  | 16:0-18:1             | 0.69   | 0.64   | 0.07 | 0.08  |
| PI-3  | 16:0-20:4             | 0.85   | 0.80   | 0.09 | 0.07  |
| PI-4  | 18:1-18:2             | 0.79   | 0.67   | 0.06 | 0.07  |
| PI-5  | 18:0-18:2             | 3.72   | 4.09   | 0.21 | 0.24  |
| PI-6  | 18:0-18:1             | 1.02   | 0.96   | 0.08 | 0.08  |
| PI-7  | 18:1-20:4             | 0.66   | 0.44   | 0.05 | 0.04  |
| PI-8  | 18:0-20:4             | 10.81  | 10.02  | 0.38 | 0.43  |
| PI-9  | 18:0-20:3             | 1.52   | 1.41   | 0.12 | 0.12  |
| PI-10 | 18:0-22:6             | 0.40   | 0.38   | 0.04 | 0.04  |
| PI-11 | 18:0-22:5             | 0.27   | 0.25   | 0.02 | 0.03  |
| PC-1  | D16:1-16:1            | 1.11   | 1.19   | 0.12 | 0.12  |
| PC-2  | D16:1-16:0            | 2.62   | 3.12   | 0.24 | 0.25  |
| PC-3  | D16:0-16:0            | 5.77   | 5.14   | 0.15 | 0.26  |
| PC-4  | D16:1-18:2            | 4.48   | 5.03   | 0.23 | 0.33  |
| PC-5  | D16:0-18:2            | 269.43 | 284.08 | 9.50 | 11.32 |
| PC-6  | D16:0-18:1            | 73.86  | 80.19  | 2.96 | 5.52  |
| PC-7  | D16:0-18:0            | 1.47   | 1.02   | 0.07 | 0.10  |
| PC-8  | A16:0-20:4            | 11.95  | 11.19  | 0.54 | 0.84  |
| PC-9  | D18:2-18:3            | 6.55   | 5.14   | 1.10 | 0.64  |
| PC-10 | D18:2-18:2            | 98.49  | 107.30 | 3.84 | 6.85  |
| PC-11 | D18:1-18:2            | 65.99  | 70.43  | 2.67 | 3.31  |
| PC-12 | D18:0-18:2            | 147.16 | 140.61 | 4.94 | 5.31  |
| PC-13 | D18:0-18:1            | 11.44  | 9.25   | 0.40 | 0.60  |
| PC-14 | D16:0-22:6/D18:2-20:4 | 38.61  | 38.00  | 2.29 | 2.51  |
| PC-15 | D18:1-20:4            | 15.61  | 16.04  | 0.91 | 1.06  |
| PC-16 | D18:2-20:2/D18:0-20:4 | 54.20  | 56.41  | 2.73 | 3.90  |

|       |            |      |      |      |      |
|-------|------------|------|------|------|------|
| PC-17 | D18:0-20:3 | 6.53 | 6.82 | 0.46 | 0.42 |
| PC-18 | D18:0-22:6 | 9.44 | 8.52 | 0.64 | 0.60 |
| PC-19 | D18:0-22:5 | 1.80 | 1.66 | 0.18 | 0.19 |
